# Supplementary material for: Ultrahigh electromagnetic interference shielding performance of lightweight, flexible, and highly conductive copper-clad carbon fiber nonwoven fabrics
Source: Royal Society of Chemistry journal article supplement (doi:10.1039/c7tc02074k), 2017-01-01
Supplement: c7tc02074k2.pdf [file c7tc02074k2.pdf]

## Electronic Supplementary Information (ESI)

### **Ultrahigh electromagnetic interference shielding performance of lightweight, flexible, and highly conductive copper-clad carbon fiber nonwoven fabrics**

Jinpyo Lee<sup>a</sup>, Yanan Liu<sup>a</sup>, Yang Liu<sup>a\*</sup>, Soo-Jin Park<sup>b</sup>, Mira Park<sup>c</sup> and Hak Yong Kim<sup>a\*</sup>

<sup>a</sup>Department of BIN Convergence Technology, Chonbuk National University, Jeonju, 561-756, South Korea

<sup>b</sup>Department of Chemistry, Inha University, Incheon 402-751, South Korea

<sup>c</sup>Department of Organic Materials and Fiber Engineering, Chonbuk National University, Jeonju 561-756, South Korea

---

\* Corresponding author: Y. Liu, H. Y. Kim

Tel: +82-63-270-2351, Fax: +82-63-270-4249.

E-mail address: khy@jbnu.ac.kr (H. Y. Kim); liu@jbnu.ac.kr (Y. Liu)

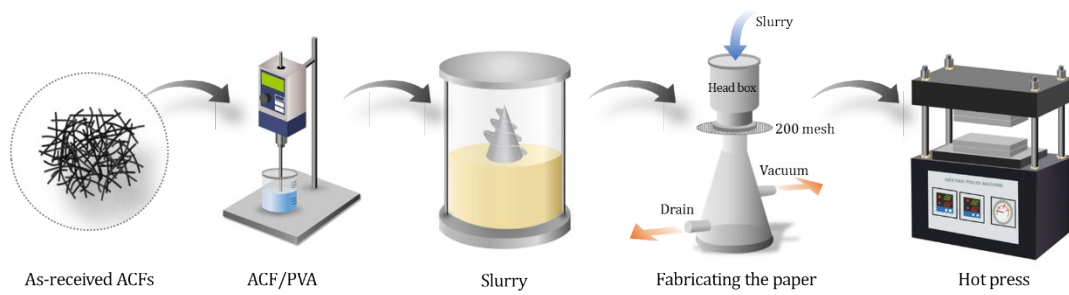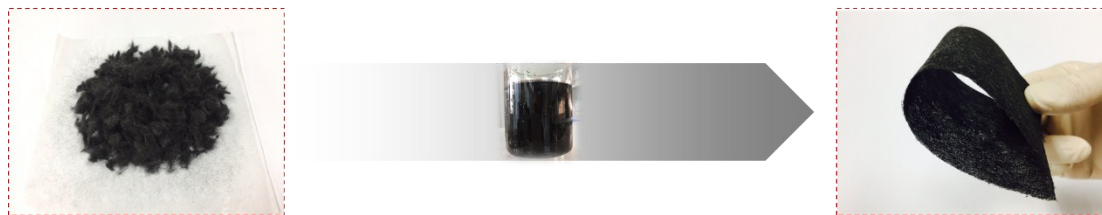

**Scheme S1** The schematic preparation diagram of carbon fiber nonwoven fabric.

**The overall anodic partial reaction for copper electroless plating process proceeds in at least two elementary steps:**

- A. Formation of electroactive species
- B. Charge transfer from electroactive species to the catalytic surface

Specifically,

A: Formation of electroactive species,  $[HC(OH)O^-]_{ads}$ , proceeds in three steps:

- a) Hydrolysis of  $H_2CO$

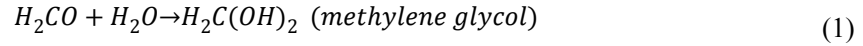

- b) Dissociation of  $H_2C(OH)_2$ ,

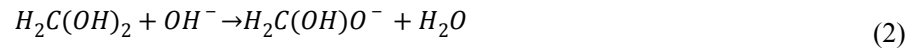

- c) Dissociative adsorption of the intermediate  $H_2C(OH)O^-$ ,

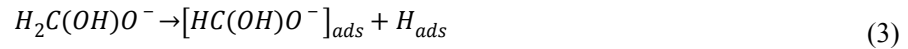

where the subscript *ads* denotes adsorption of species. The adsorption of intermediate involves breaking of C–H bond.

B: Charge transfer, the electroactive species oxides according to the reaction

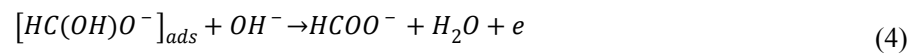

The adsorbed hydrogen,  $H_{ads}$ , could be desorbed in the chemical reaction

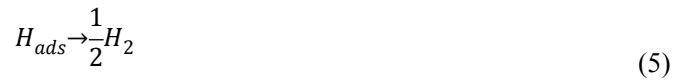

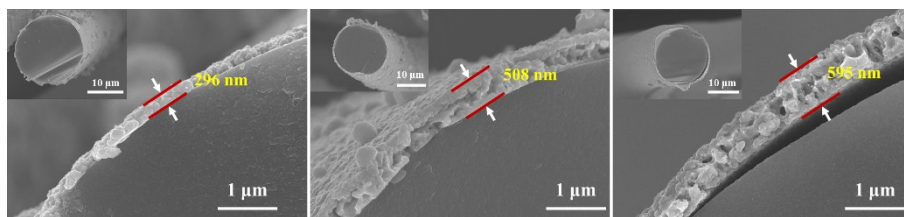

**Fig. S1** The cross-section FE-SEM images of Cu@ACFs-3, Cu@ACFs-5 and Cu@ACFs-10, which showed the thickness of Cu coatings on ACFs (296 nm, 508 nm and 595 nm, respectively).

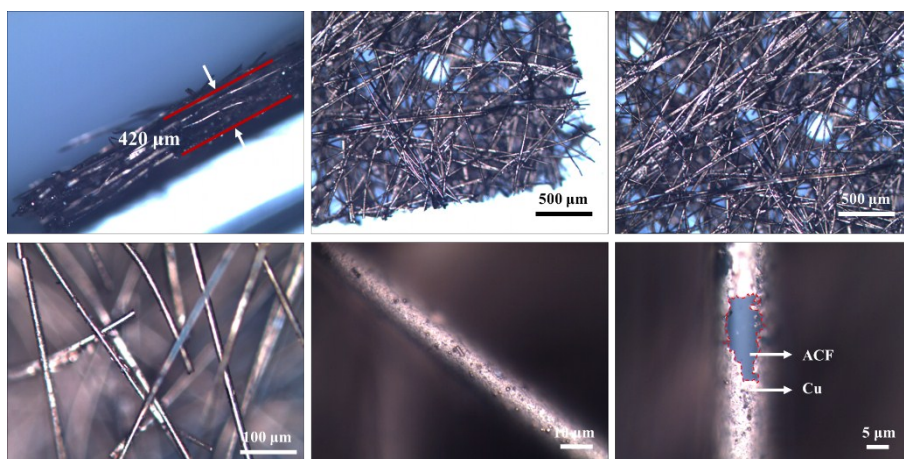

**Fig. S2** The morphology images of Cu@ACFs-5 that were observed from optical microscope.

**Table S1** Specific EMI shielding performances optimized with the thickness of foam structure-based shielding materials and pure copper foil.

| Samples                                      | Density (g/cm <sup>3</sup> ) | t (cm)         | SE (dB)     | SSE (dB cm <sup>3</sup> g <sup>-1</sup> ) | SSE/t (dB cm <sup>2</sup> g <sup>-1</sup> ) | Ref.             |
|----------------------------------------------|------------------------------|----------------|-------------|-------------------------------------------|---------------------------------------------|------------------|
| 30% rGO + PS                                 | 0.45                         | 0.25           | 29          | 64.4                                      | 257.6                                       | S1               |
| 10% rGO/Fe <sub>3</sub> O <sub>4</sub> + PEI | 0.4                          | 0.25           | 18          | 44                                        | 176                                         | S2               |
| 7% SWCNT + PS                                | 0.56                         | 0.12           | 18.5        | 33                                        | 275                                         | S3               |
| 0.8 wt% Gr + PDMS                            | 0.06                         | 0.16           | 20          | 500                                       | 3125                                        | S4               |
| 5 wt% Gr + PMMA                              | 0.79                         | 0.4            | 19          | 25                                        | 62.5                                        | S5               |
| Bulk carbon foam                             | 0.166                        | 0.2            | 40          | 241                                       | 1250                                        | S6               |
| CuNi-CNT                                     | 0.23                         | 0.15           | 54.6        | 237                                       | 1580                                        | S7               |
| Dense Cu foil                                | 6.944                        | 0.0032         | 46.3        | 6.67                                      | 2084.38                                     | <b>This work</b> |
| Pure ACFs                                    | 0.092                        | 0.03485        | 11.3        | 122.8                                     | 3523.67                                     |                  |
| <b>Cu@ACFs-1</b>                             | <b>0.125</b>                 | <b>0.03882</b> | <b>16.2</b> | <b>129.6</b>                              | <b>3338.49</b>                              |                  |
| <b>Cu@ACFs-3</b>                             | <b>0.131</b>                 | <b>0.04028</b> | <b>58.2</b> | <b>444.3</b>                              | <b>10491.15</b>                             |                  |
| <b>Cu@ACFs-5</b>                             | <b>0.150</b>                 | <b>0.04235</b> | <b>69.8</b> | <b>465.3</b>                              | <b>10987.01</b>                             |                  |
| <b>Cu@ACFs-10</b>                            | <b>0.169</b>                 | <b>0.0432</b>  | <b>81.5</b> | <b>482.2</b>                              | <b>11162.04</b>                             |                  |

The Specific shielding effectiveness (SSE) and Absolute effectiveness (SSE<sub>t</sub>) were calculated by the following equation[S8-10]:

$$SSE = \text{EMI SE}/\text{density} = \text{dB cm}^3 \text{ g}^{-1}$$

$$SSE_t = \text{SSE}/\text{thickness} = \text{dB cm}^3 \text{ g}^{-1} \text{ cm}^{-1} = \text{dB cm}^2 \text{ g}^{-1}$$

**Table S2** Relationship between shielding effectiveness (dB) and shielding efficiency (%).

| Shielding Effectiveness (dB) | Shielding Efficiency (%) |
|------------------------------|--------------------------|
| 0                            | 0                        |
| 10                           | 90                       |
| 20                           | 99                       |
| 30                           | 99.9                     |
| 40                           | 99.99                    |
| 50                           | 99.999                   |
| 60                           | 99.9999                  |
| 70                           | 99.99999                 |
| 80                           | 99.999999                |
| 90                           | 99.9999999               |

The EMI shielding efficiency (%) was calculated by the following equation[S8, S9]:

$$\text{Shielding efficiency (\%)} = 100 - \left(10^{\frac{SE}{10}}\right)^{-1} \times 100$$

**Table S3** Electrochemical corrosion parameters obtained from polarization curves and  $i_{\text{corr}}$  tested in a 3.5% NaCl solution.

| Samples           | $E_{\text{corr}}$ (V vs. Ag/AgCl) | $E_{\text{pit}}$ (V vs. Ag/AgCl) | $\Delta E_p$ | $i_{\text{corr}}$ (A/cm <sup>2</sup> ) |
|-------------------|-----------------------------------|----------------------------------|--------------|----------------------------------------|
| <i>Cu@ACFs-3</i>  | -1.04 ± 0.02                      | 6.5×10 <sup>-4</sup>             | 1.041        | (5.75 ± 0.46) ×10 <sup>-4</sup>        |
| <i>Cu@ACFs-5</i>  | -1.0 ± 0.01                       | 0.178                            | 1.178        | (5.13 ± 0.12) ×10 <sup>-4</sup>        |
| <i>Cu@ACFs-10</i> | -1.02 ± 0.02                      | 0.03                             | 1.05         | (6.96 ± 0.33) ×10 <sup>-4</sup>        |

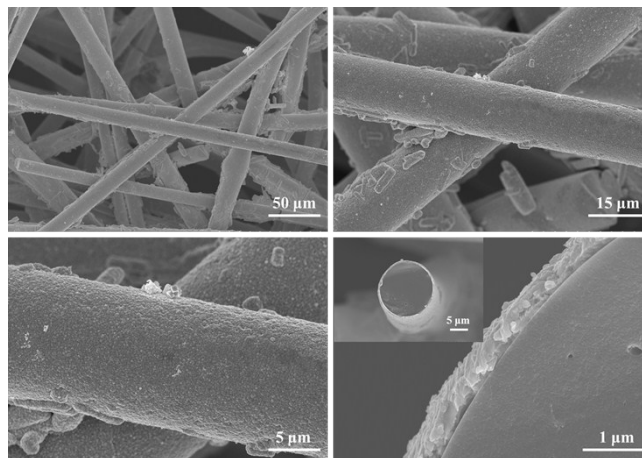

**Fig. S3** FE-SEM images of Cu@ACFs-5 after electrochemical corrosion test.

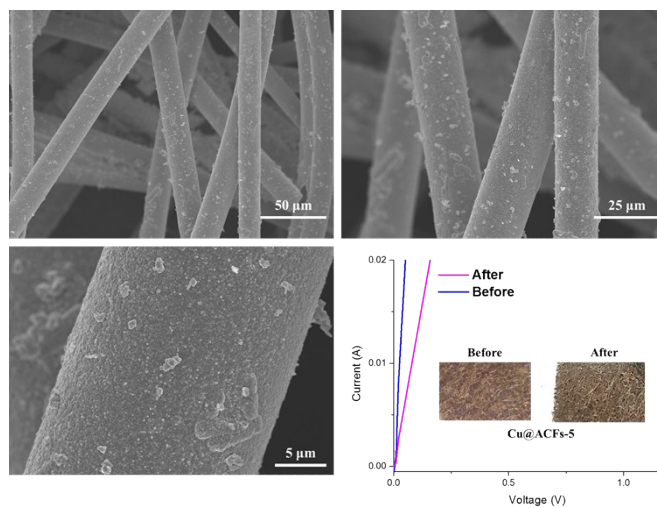

**Fig. S4** FE-SEM images and I-V curves of Cu@ACFs-5 sample after salt mist test.

## References

- S1. D.-X. Yan, P.-G. Ren, H. Pang, Q. Fu, M.-B. Yang and Z.-M. Li, *Journal of Materials Chemistry*, 2012, **22**, 18772-18774.
- S2. B. Shen, W. Zhai, M. Tao, J. Ling and W. Zheng, *ACS Applied Materials & Interfaces*, 2013, **5**, 11383-11391.
- S3. Y. Yang, M. C. Gupta, K. L. Dudley and R. W. Lawrence, *Nano Letters*, 2005, **5**, 2131-2134.
- S4. Z. Chen, C. Xu, C. Ma, W. Ren and H.-M. Cheng, *Advanced Materials*, 2013, **25**, 1296-1300.
- S5. H.-B. Zhang, Q. Yan, W.-G. Zheng, Z. He and Z.-Z. Yu, *ACS Applied Materials & Interfaces*, 2011, **3**, 918-924.
- S6. F. Moglie, D. Micheli, S. Laurenzi, M. Marchetti and V. Mariani Primiani, *Carbon*, 2012, **50**, 1972-1980.
- S7. K. Ji, H. Zhao, J. Zhang, J. Chen and Z. Dai, *Applied Surface Science*, 2014, **311**, 351-356.
- S8. F. Shahzad, M. Alhabeb, C. B. Hatter, B. Anasori, S. Man Hong, C. M. Koo and Y. Gogotsi, *Science*, 2016, **353**, 1137-1140.
- S9. A. Ameli, M. Nofar, S. Wang and C. B. Park, *ACS Applied Materials & Interfaces*, 2014, **6**, 11091-11100.
- S10. Z. Zeng, H. Jin, M. Chen, W. Li, L. Zhou and Z. Zhang, *Advanced Functional Materials*, 2016, **26**, 303-310.
